# Supplementary material
Source: Research Square preprint supplement (doi:10.21203/rs.3.rs-9270019/v1)
Supplement: Supplementary file 1 [file e23500db3863899e83874124.xlsx]

## Sheet: Suplementary_File_1
TERRITORY		YEARS											TERRITORIAL COVERAGE
REGION	COMMUNE	2015	2016	2017	2018	2019	2020	2021	2022	2023	2024	TOTAL	Regional centralization	% Regional Coverage	Coverage Total
Arica y Parinacota	Arica	0	0	1	0	0	0	0	1	1	0	3	100	25	25
	Camarones	0	0	0	0	0	0	0	0	0	0	0	0	25	0
	General Lagos	0	0	0	0	0	0	0	0	0	0	0	0	25	0
	Putre	0	0	0	0	0	0	0	0	0	0	0	0	25	0
	1st and 2nd five-year period	33.3333					66.6667					3	100	Regional Coverage Total	25
Tarapacá	Alto Hospicio	0	1	0	0	0	0	0	0	0	0	1	20	14.2857	14.2857
	Camiña	0	0	0	0	0	0	0	0	0	0	0	0	14.2857	0
	Colchane	0	0	0	0	0	0	0	0	0	0	0	0	14.2857	0
	Huara	0	0	0	0	0	0	0	0	0	0	0	0	14.2857	0
	Iquique	0	0	0	0	2	1	1	0	0	0	4	80	14.2857	14.2857
	Pica	0	0	0	0	0	0	0	0	0	0	0	0	14.2857	0
	Pozo Almonte	0	0	0	0	0	0	0	0	0	0	0	0	14.2857	0
	1st and 2nd five-year period	60					40					5	80	Regional Coverage Total	28.5714
Antofagasta	Antofagasta	0	0	0	0	0	0	0	0	2	0	2	33.3333	11.1111	11.1111
	Calama	0	0	0	2	1	0	0	0	0	0	3	50	11.1111	11.1111
	María Elena	0	0	0	0	0	0	0	0	0	0	0	0	11.1111	0
	Mejillones	0	0	0	0	0	0	0	0	0	0	0	0	11.1111	0
	Ollagüe	0	0	0	0	0	0	0	0	0	0	0	0	11.1111	0
	San Pedro de Atacama	0	0	0	0	1	0	0	0	0	0	1	16.6667	11.1111	11.1111
	Sierra Gorda	0	0	0	0	0	0	0	0	0	0	0	0	11.1111	0
	Taltal	0	0	0	0	0	0	0	0	0	0	0	0	11.1111	0
	Tocopilla	0	0	0	0	0	0	0	0	0	0	0	0	11.1111	0
	1st and 2nd five-year period	66.6667					33.3333					6	33.3333	Regional Coverage Total	33.3333
Atacama	Alto del Carmen	0	0	0	0	0	0	0	0	0	0	0	0	11.1111	0
	Caldera	0	0	1	0	0	0	0	0	0	0	1	50	11.1111	11.1111
	Chañaral	0	0	0	0	0	0	0	0	0	0	0	0	11.1111	0
	Copiapó	0	0	0	0	0	0	0	1	0	0	1	50	11.1111	11.1111
	Diego de Almagro	0	0	0	0	0	0	0	0	0	0	0	0	11.1111	0
	Freirina	0	0	0	0	0	0	0	0	0	0	0	0	11.1111	0
	Huasco	0	0	0	0	0	0	0	0	0	0	0	0	11.1111	0
	Tierra Amarilla	0	0	0	0	0	0	0	0	0	0	0	0	11.1111	0
	Vallenar	0	0	0	0	0	0	0	0	0	0	0	0	11.1111	0
	1st and 2nd five-year period	50					50					2	50	Regional Coverage Total	22.2222
Coquimbo	Andacollo	0	0	0	0	0	0	0	0	0	0	0	0	6.66667	0
	Canela	0	0	0	0	0	0	0	0	0	0	0	0	6.66667	0
	Combarbalá	0	0	0	0	0	0	0	0	0	0	0	0	6.66667	0
	Coquimbo	0	0	0	0	0	0	0	0	0	0	0	0	6.66667	0
	Illapel	0	0	0	0	0	0	0	0	0	0	0	0	6.66667	0
	La Higuera	0	0	0	0	0	0	0	0	0	0	0	0	6.66667	0
	La Serena	0	0	0	0	0	0	2	0	0	0	2	66.6667	6.66667	6.66667
	Los Vilos	0	0	0	0	0	0	0	0	0	0	0	0	6.66667	0
	Monte Patria	0	0	0	0	0	0	0	0	0	0	0	0	6.66667	0
	Ovalle	0	0	0	0	0	0	0	0	0	0	0	0	6.66667	0
	Paiguano	0	0	0	0	0	0	0	0	0	0	0	0	6.66667	0
	Punitaqui	0	0	0	0	0	0	0	0	0	0	0	0	6.66667	0
	Río Hurtado	0	0	0	0	0	0	0	0	0	0	0	0	6.66667	0
	Salamanca	0	0	0	0	0	0	0	0	0	0	0	0	6.66667	0
	Vicuña	0	0	0	0	0	0	1	0	0	0	1	33.3333	6.66667	6.66667
	1st and 2nd five-year period	0					100					3	66.6667	Regional Coverage Total	13.3333
Valparaíso	Algarrobo	0	0	0	0	0	0	0	0	0	0	0	0	2.63158	0
	Cabildo	0	0	0	0	0	0	0	0	0	0	0	0	2.63158	0
	Calle Larga	0	0	0	0	0	0	0	0	0	0	0	0	2.63158	0
	Cartagena	0	0	0	0	0	0	0	0	0	0	0	0	2.63158	0
	Casablanca	0	0	0	0	0	0	0	0	0	0	0	0	2.63158	0
	Catemu	0	0	0	0	0	0	0	0	0	0	0	0	2.63158	0
	Concón	0	0	0	0	0	0	0	0	0	0	0	0	2.63158	0
	El Quisco	0	0	0	0	0	0	0	0	0	0	0	0	2.63158	0
	El Tabo	0	0	0	0	0	0	0	0	0	0	0	0	2.63158	0
	Hijuela	0	0	0	0	0	0	0	0	0	0	0	0	2.63158	0
	Isla de Pascua	0	0	0	1	0	1	0	0	0	0	2	12.5	2.63158	2.63158
	Juan Fernández	0	0	0	0	0	0	0	0	0	0	0	0	2.63158	0
	La Calera	0	0	0	0	0	0	0	0	0	0	0	0	2.63158	0
	La Cruz	0	0	0	0	0	0	0	0	0	0	0	0	2.63158	0
	La Ligua	0	0	0	0	0	0	0	0	0	0	0	0	2.63158	0
	Limache	0	0	1	0	0	0	0	0	0	0	1	6.25	2.63158	2.63158
	Llaillay	0	0	0	0	0	0	0	0	0	0	0	0	2.63158	0
	Los Andes	0	0	0	0	0	0	0	0	0	0	0	0	2.63158	0
	Nogales	0	0	0	0	0	0	0	0	0	0	0	0	2.63158	0
	Olmué	0	0	0	0	0	0	0	0	0	0	0	0	2.63158	0
	Panquehue	0	0	0	0	0	0	0	0	0	0	0	0	2.63158	0
	Papudo	0	0	0	0	0	0	0	0	0	0	0	0	2.63158	0
	Petorca	0	0	0	0	0	0	0	0	0	0	0	0	2.63158	0
	Puchuncaví	0	0	0	0	0	0	0	0	0	0	0	0	2.63158	0
	Putaendo	0	0	0	0	0	0	0	0	0	0	0	0	2.63158	0
	Quillota	0	0	0	0	1	0	1	0	0	0	2	12.5	2.63158	2.63158
	Quilpué	0	0	0	0	1	0	0	1	0	1	3	18.75	2.63158	2.63158
	Quintero	0	0	0	0	0	0	0	0	0	0	0	0	2.63158	2.63158
	Rinconada	0	0	0	0	0	0	0	0	0	0	0	0	2.63158	0
	San Antonio	0	0	0	0	0	0	0	0	0	0	0	0	2.63158	0
	San Esteban	0	0	0	0	0	0	0	0	0	0	0	0	2.63158	0
	San Felipe	0	0	0	1	0	0	0	0	0	0	1	6.25	2.63158	2.63158
	Santa María	0	0	0	0	0	0	0	0	0	0	0	0	2.63158	0
	Santo Domingo	0	0	0	0	0	0	0	0	0	0	0	0	2.63158	0
	Valparaíso	0	0	1	0	0	0	0	1	0	1	3	18.75	2.63158	2.63158
	Villa Alemana	0	0	0	0	0	0	0	0	0	0	0	0	2.63158	0
	Viña del Mar	0	0	1	0	0	1	0	1	1	0	4	25	2.63158	2.63158
	Zapallar	0	0	0	0	0	0	0	0	0	0	0	0	2.63158	0
	1st and 2nd five-year period	43.8					56.3					16	18.8	Regional Coverage Total	21.0526
O'Higgins	Chépica	0	0	0	0	0	0	0	0	0	0	0	0	3.0303	0
	Chimbarongo	0	0	0	0	0	0	0	0	0	0	0	0	3.0303	0
	Codegua	0	0	0	0	0	0	0	0	0	0	0	0	3.0303	0
	Coinco	0	0	0	0	0	0	0	0	0	0	0	0	3.0303	0
	Coltauco	0	0	0	0	0	0	0	0	0	0	0	0	3.0303	0
	Doñihue	0	0	0	0	0	0	0	0	0	0	0	0	3.0303	0
	Graneros	0	0	0	0	0	0	0	0	0	0	0	0	3.0303	0
	La Estrella	0	0	0	0	0	0	0	0	0	0	0	0	3.0303	0
	Las Cabras	0	0	0	0	0	0	0	0	0	0	0	0	3.0303	0
	Litueche	0	0	0	0	0	0	0	0	0	0	0	0	3.0303	0
	Lolol	0	0	0	0	0	0	0	0	0	0	0	0	3.0303	0
	Machalí	0	0	0	0	0	0	0	0	0	0	0	0	3.0303	0
	Malloa	0	0	0	0	0	0	0	0	0	0	0	0	3.0303	0
	Marchihue	0	0	0	0	0	0	0	0	0	0	0	0	3.0303	0
	Mostazal	0	0	0	0	1	0	0	0	0	0	1	33.3333	3.0303	3.0303
	Nancagua	0	0	0	0	0	0	0	0	0	0	0	0	3.0303	0
	Navidad	0	0	0	0	0	0	0	0	0	0	0	0	3.0303	0
	Olivar	0	0	0	0	0	0	0	0	0	0	0	0	3.0303	0
	Palmilla	0	0	0	0	0	0	0	0	0	0	0	0	3.0303	0
	Paredones	0	0	0	0	0	0	0	0	0	0	0	0	3.0303	0
	Peralillo	0	0	0	0	0	0	0	0	0	0	0	0	3.0303	0
	Peumo	0	0	0	0	0	0	0	0	0	0	0	0	3.0303	0
	Pichidegua	0	0	0	0	0	0	0	0	0	0	0	0	3.0303	0
	Pichilemu	0	0	0	0	0	0	1	0	0	0	1	33.3333	3.0303	3.0303
	Placilla	0	0	0	0	0	0	0	0	0	0	0	0	3.0303	0
	Pumanque	0	0	0	0	0	0	0	0	0	0	0	0	3.0303	0
	Quinta de Tilcoco	0	0	0	0	0	0	0	0	0	0	0	0	3.0303	0
	Rancagua	0	0	0	0	0	0	0	0	0	0	0	0	3.0303	0
	Rengo	0	0	0	0	0	0	0	1	0	0	1	33.3333	3.0303	3.0303
	Requínoa	0	0	0	0	0	0	0	0	0	0	0	0	3.0303	0
	San Fernando	0	0	0	0	0	0	0	0	0	0	0	0	3.0303	0
	San Vicente	0	0	0	0	0	0	0	0	0	0	0	0	3.0303	0
	Santa Cruz	0	0	0	0	0	0	0	0	0	0	0	0	3.0303	0
	1st and 2nd five-year period	33.3333					66.6667					3	0	Regional Coverage Total	9.09091
Maule	Cauquenes	0	0	0	0	0	0	0	0	0	0	0	0	3.33333	0
	Chanco	0	0	0	0	0	0	0	0	0	0	0	0	3.33333	0
	Colbún	0	0	0	0	0	0	0	0	0	0	0	0	3.33333	0
	Constitución	0	0	0	0	0	0	0	0	0	0	0	0	3.33333	0
	Curepto	0	0	0	0	0	0	0	0	0	0	0	0	3.33333	0
	Curicó	0	1	0	1	0	0	1	0	0	0	3	75	3.33333	3.33333
	Empedrado	0	0	0	0	0	0	0	0	0	0	0	0	3.33333	0
	Hualañé	0	0	0	0	0	0	0	0	0	0	0	0	3.33333	0
	Licantén	0	0	0	0	0	0	0	0	0	0	0	0	3.33333	0
	Linares	0	0	0	0	0	0	0	0	0	0	0	0	3.33333	0
	Longaví	0	0	0	0	0	0	0	0	0	0	0	0	3.33333	0
	Maule	0	0	0	0	0	0	0	0	0	0	0	0	3.33333	0
	Molina	0	0	0	0	0	0	0	0	0	0	0	0	3.33333	0
	Parral	0	0	0	0	0	0	0	0	0	0	0	0	3.33333	0
	Pelarco	0	0	0	0	0	0	0	0	0	0	0	0	3.33333	0
	Pelluhue	0	0	0	0	0	0	0	0	0	0	0	0	3.33333	0
	Pencahue	0	0	0	0	0	0	0	0	0	0	0	0	3.33333	0
	Rauco	0	0	0	0	0	0	0	0	0	0	0	0	3.33333	0
	Retiro	0	0	0	0	0	0	0	0	0	0	0	0	3.33333	0
	Río Claro	0	0	0	0	0	0	0	0	0	0	0	0	3.33333	0
	Romeral	0	0	0	0	0	0	0	0	0	0	0	0	3.33333	0
	Sagrada Familia	0	0	0	0	0	0	0	0	0	0	0	0	3.33333	0
	San Clemente	0	0	0	0	0	0	0	0	0	0	0	0	3.33333	0
	San Javier	0	0	0	0	0	0	0	0	0	0	0	0	3.33333	0
	San Rafael	0	0	0	0	0	0	0	0	0	0	0	0	3.33333	0
	Talca	0	0	0	1	0	0	0	0	0	0	1	25	3.33333	3.33333
	Teno	0	0	0	0	0	0	0	0	0	0	0	0	3.33333	0
	Vichuquén	0	0	0	0	0	0	0	0	0	0	0	0	3.33333	0
	Villa Alegre	0	0	0	0	0	0	0	0	0	0	0	0	3.33333	0
	Yerbas Buenas	0	0	0	0	0	0	0	0	0	0	0	0	3.33333	0
	1st and 2nd five-year period	75					25					4	25	Regional Coverage Total	6.66667
Ñuble	Bulnes	0	0	0	0	0	0	0	0	0	0	0	0	4.7619	0
	Chillán	0	1	0	0	1	0	0	0	0	0	2	50	4.7619	4.7619
	Chillán Viejo	0	0	0	0	0	1	0	1	0	0	2	50	4.7619	4.7619
	Cobquecura	0	0	0	0	0	0	0	0	0	0	0	0	4.7619	0
	Coelemu	0	0	0	0	0	0	0	0	0	0	0	0	4.7619	0
	Coihueco	0	0	0	0	0	0	0	0	0	0	0	0	4.7619	0
	El Carmen	0	0	0	0	0	0	0	0	0	0	0	0	4.7619	0
	Ninhue	0	0	0	0	0	0	0	0	0	0	0	0	4.7619	0
	Ñiquén	0	0	0	0	0	0	0	0	0	0	0	0	4.7619	0
	Pemuco	0	0	0	0	0	0	0	0	0	0	0	0	4.7619	0
	Pinto	0	0	0	0	0	0	0	0	0	0	0	0	4.7619	0
	Portezuelo	0	0	0	0	0	0	0	0	0	0	0	0	4.7619	0
	Quillón	0	0	0	0	0	0	0	0	0	0	0	0	4.7619	0
	Quirihue	0	0	0	0	0	0	0	0	0	0	0	0	4.7619	0
	Ránquil	0	0	0	0	0	0	0	0	0	0	0	0	4.7619	0
	San Carlos	0	0	0	0	0	0	0	0	0	0	0	0	4.7619	0
	San Fabián	0	0	0	0	0	0	0	0	0	0	0	0	4.7619	0
	San Ignacio	0	0	0	0	0	0	0	0	0	0	0	0	4.7619	0
	San Nicolás	0	0	0	0	0	0	0	0	0	0	0	0	4.7619	0
	Treguaco	0	0	0	0	0	0	0	0	0	0	0	0	4.7619	0
	Yungay	0	0	0	0	0	0	0	0	0	0	0	0	4.7619	0
	1st and 2nd five-year period	50					50					4	50	Regional Coverage Total	9.52381
Biobío	Alto Biobío	0	0	0	0	0	0	0	0	0	0	0	0	3.0303	0
	Antuco	0	0	0	0	0	0	0	0	0	0	0	0	3.0303	0
	Arauco	0	0	0	0	0	0	0	0	0	0	0	0	3.0303	0
	Cabrero	0	0	0	0	0	0	0	0	0	0	0	0	3.0303	0
	Cañete	0	0	0	0	0	0	0	0	0	0	0	0	3.0303	0
	Chiguayante	0	0	0	0	0	0	0	0	0	0	0	0	3.0303	0
	Concepción	0	0	1	1	0	1	0	1	0	0	4	50	3.0303	3.0303
	Contulmo	0	0	0	0	0	0	0	0	0	0	0	0	3.0303	0
	Coronel	0	0	0	0	0	0	0	0	0	0	0	0	3.0303	0
	Curanilahue	0	0	0	0	0	0	0	0	0	0	0	0	3.0303	0
	Florida	0	0	0	0	0	0	0	0	0	0	0	0	3.0303	0
	Hualpén	0	0	0	0	0	0	0	0	0	0	0	0	3.0303	0
	Hualqui	0	0	0	0	0	0	0	0	0	0	0	0	3.0303	0
	Laja	0	0	0	0	0	0	0	0	0	0	0	0	3.0303	0
	Lebu	0	0	0	0	0	0	0	0	0	0	0	0	3.0303	0
	Los Álamos	0	0	0	0	0	0	0	0	0	0	0	0	3.0303	0
	Los Ángeles	0	0	0	0	0	0	0	0	0	2	2	25	3.0303	3.0303
	Lota	0	0	0	0	0	0	0	0	0	0	0	0	3.0303	0
	Mulchén	0	0	0	0	0	0	0	0	0	0	0	0	3.0303	0
	Nacimiento	0	0	0	0	0	0	0	0	0	0	0	0	3.0303	0
	Negrete	0	0	0	0	0	0	0	0	0	0	0	0	3.0303	0
	Penco	0	0	0	0	0	0	0	0	0	0	0	0	3.0303	0
	Quilaco	0	0	0	0	0	0	0	0	0	0	0	0	3.0303	0
	Quilleco	0	0	0	0	0	0	0	0	0	0	0	0	3.0303	0
	San Pedro de la Paz	0	0	0	0	0	0	0	0	0	1	1	12.5	3.0303	3.0303
	San Rosendo	0	0	0	0	0	0	0	0	0	0	0	0	3.0303	0
	Santa Bárbara	0	0	0	0	0	0	0	0	0	0	0	0	3.0303	0
	Santa Juana	0	0	0	0	0	0	0	0	0	0	0	0	3.0303	0
	Talcahuano	0	0	0	0	0	0	0	0	0	1	1	12.5	3.0303	3.0303
	Tirúa	0	0	0	0	0	0	0	0	0	0	0	0	3.0303	0
	Tomé	0	0	0	0	0	0	0	0	0	0	0	0	3.0303	0
	Tucapel	0	0	0	0	0	0	0	0	0	0	0	0	3.0303	0
	Yumbel	0	0	0	0	0	0	0	0	0	0	0	0	3.0303	0
	1st and 2nd five-year period	25					75					8	50	Regional Coverage Total	12.1212
La Araucanía	Angol	0	0	0	0	0	0	0	0	0	0	0	0	3.125	0
	Carahue	0	0	0	0	0	0	0	0	0	0	0	0	3.125	0
	Cholchol	0	0	0	0	0	0	0	0	0	0	0	0	3.125	0
	Collipulli	0	0	0	0	0	0	0	0	0	0	0	0	3.125	0
	Cunco	0	0	0	2	0	0	0	0	0	0	2	16.6667	3.125	3.125
	Curacautín	0	0	0	0	0	0	0	0	0	0	0	0	3.125	0
	Curarrehue	0	0	0	0	0	0	0	0	0	0	0	0	3.125	0
	Ercilla	0	0	0	0	0	0	0	0	0	0	0	0	3.125	0
	Freire	0	0	0	0	0	0	0	0	0	0	0	0	3.125	0
	Galvarino	0	0	0	0	0	0	0	0	0	0	0	0	3.125	0
	Gorbea	0	0	0	0	0	0	0	0	0	0	0	0	3.125	0
	Lautaro	0	0	0	0	0	0	1	0	0	0	1	8.33333	3.125	3.125
	Loncoche	0	0	0	0	0	0	0	0	0	0	0	0	3.125	0
	Lonquimay	0	0	0	0	0	0	0	0	0	0	0	0	3.125	0
	Los Sauces	0	0	0	0	0	0	0	0	0	0	0	0	3.125	0
	Lumaco	0	0	0	0	0	0	0	0	0	0	0	0	3.125	0
	Melipeuco	0	0	0	0	0	0	0	0	0	0	0	0	3.125	0
	Nueva Imperial	0	0	0	0	1	0	0	0	0	0	1	8.33333	3.125	3.125
	Padre Las Casas	0	0	0	0	0	0	0	0	0	0	0	0	3.125	0
	Perquenco	0	0	0	0	0	0	0	0	0	0	0	0	3.125	0
	Pitrufquén	0	0	0	1	0	0	0	0	0	0	1	8.33333	3.125	3.125
	Pucón	0	0	0	0	0	0	1	0	0	0	1	8.33333	3.125	3.125
	Purén	0	0	0	0	0	0	0	0	0	0	0	0	3.125	0
	Renaico	0	0	0	0	0	0	0	0	0	0	0	0	3.125	0
	Saavedra	0	0	0	0	0	0	0	0	0	0	0	0	3.125	0
	Temuco	1	0	1	0	0	0	0	0	2	2	6	50	3.125	3.125
	Teodoro Schmidt	0	0	0	0	0	0	0	0	0	0	0	0	3.125	0
	Toltén	0	0	0	0	0	0	0	0	0	0	0	0	3.125	0
	Traiguén	0	0	0	0	0	0	0	0	0	0	0	0	3.125	0
	Victoria	0	0	0	0	0	0	0	0	0	0	0	0	3.125	0
	Vilcún	0	0	0	0	0	0	0	0	0	0	0	0	3.125	0
	Villarrica	0	0	0	0	0	0	0	0	0	0	0	0	3.125	0
	1st and 2nd five-year period	50					50					12	50	Regional Coverage Total	18.75
Los Ríos	Corral	0	0	0	0	0	0	0	0	0	0	0	0	8.33333	0
	Futrono	0	0	0	0	0	0	0	0	0	0	0	0	8.33333	0
	La Unión	0	0	0	0	0	0	0	0	0	0	0	0	8.33333	0
	Lago Ranco	0	0	0	0	0	0	0	0	0	0	0	0	8.33333	0
	Lanco	0	0	0	0	0	0	0	0	0	0	0	0	8.33333	0
	Los Lagos	0	0	0	0	0	0	0	0	0	0	0	0	8.33333	0
	Máfil	0	0	0	0	0	0	0	0	0	0	0	0	8.33333	0
	Mariquina	0	0	0	0	0	0	0	0	0	0	0	0	8.33333	0
	Paillaco	0	0	0	0	0	0	0	0	0	0	0	0	8.33333	0
	Panguipulli	0	0	0	0	0	0	0	0	0	1	1	11.1111	8.33333	8.33333
	Río Bueno	0	0	0	0	0	0	0	0	0	0	0	0	8.33333	0
	Valdivia	0	0	1	1	2	1	0	1	1	1	8	88.8889	8.33333	8.33333
	1st and 2nd five-year period	44.4444					55.5556					9	88.8889	Regional Coverage Total	16.6667
Los Lagos	Ancud	0	0	0	0	0	0	0	0	0	0	0	0	3.33333	0
	Calbuco	0	0	0	0	0	0	0	0	0	0	0	0	3.33333	0
	Castro	0	0	0	0	0	0	1	0	0	0	1	8.33333	3.33333	3.33333
	Chaitén	0	0	0	0	0	0	0	0	0	0	0	0	3.33333	0
	Chonchi	0	0	0	0	0	0	0	0	0	0	0	0	3.33333	0
	Cochamó	0	0	0	0	0	0	0	0	0	0	0	0	3.33333	0
	Curaco de Vélez	0	0	0	0	0	0	0	0	0	0	0	0	3.33333	0
	Dalcahue	0	0	0	0	0	0	0	0	0	0	0	0	3.33333	0
	Fresia	0	0	0	0	0	0	0	0	0	0	0	0	3.33333	0
	Frutillar	0	0	0	0	0	0	0	0	0	0	0	0	3.33333	0
	Futaleufú	0	0	0	0	0	0	0	0	0	0	0	0	3.33333	0
	Hualaihué	0	0	0	0	0	0	0	0	0	0	0	0	3.33333	0
	Llanquihue	0	0	0	0	0	0	0	0	0	0	0	0	3.33333	0
	Los Muermos	0	0	0	0	0	0	0	0	0	0	0	0	3.33333	0
	Maullín	0	0	0	0	0	0	0	0	0	0	0	0	3.33333	0
	Osorno	0	0	0	0	0	0	0	0	0	0	0	0	3.33333	0
	Palena	0	0	0	0	0	0	0	0	0	0	0	0	3.33333	0
	Puerto Montt	0	0	0	1	1	1	0	0	0	2	5	41.6667	3.33333	3.33333
	Puerto Octay	0	0	0	0	0	0	0	0	0	0	0	0	3.33333	0
	Puerto Varas	0	0	2	0	2	0	0	0	0	2	6	50	3.33333	3.33333
	Puqueldón	0	0	0	0	0	0	0	0	0	0	0	0	3.33333	0
	Purranque	0	0	0	0	0	0	0	0	0	0	0	0	3.33333	0
	Puyehue	0	0	0	0	0	0	0	0	0	0	0	0	3.33333	0
	Queilén	0	0	0	0	0	0	0	0	0	0	0	0	3.33333	0
	Quellón	0	0	0	0	0	0	0	0	0	0	0	0	3.33333	0
	Quemchi	0	0	0	0	0	0	0	0	0	0	0	0	3.33333	0
	Quinchao	0	0	0	0	0	0	0	0	0	0	0	0	3.33333	0
	Río Negro	0	0	0	0	0	0	0	0	0	0	0	0	3.33333	0
	San Juan de la Costa	0	0	0	0	0	0	0	0	0	0	0	0	3.33333	0
	San Pablo	0	0	0	0	0	0	0	0	0	0	0	0	3.33333	0
	1st and 2nd five-year period	50					50					12	41.6667	Regional Coverage Total	10
Aysén	Aysén	0	0	1	0	0	0	0	0	0	0	1	20	10	10
	Chile Chico	0	0	0	0	0	0	0	0	0	0	0	0	10	0
	Cisnes	0	0	0	0	0	0	0	0	0	0	0	0	10	0
	Cochrane	0	0	0	0	0	0	0	0	0	0	0	0	10	0
	Coyhaique	0	0	0	0	0	1	0	0	2	1	4	80	10	10
	Guaitecas	0	0	0	0	0	0	0	0	0	0	0	0	10	0
	Lago Verde	0	0	0	0	0	0	0	0	0	0	0	0	10	0
	O´Higgins	0	0	0	0	0	0	0	0	0	0	0	0	10	0
	Río Ibáñez	0	0	0	0	0	0	0	0	0	0	0	0	10	0
	Tortel	0	0	0	0	0	0	0	0	0	0	0	0	10	0
	1st and 2nd five-year period	20					80					5	80	Regional Coverage Total	20
Magallanes	Antártica	0	0	0	0	0	0	0	0	0	0	0	0	9.09091	0
	Cabo de Hornos	0	0	0	0	0	0	0	0	0	0	0	0	9.09091	0
	Laguna Blanca	0	0	0	0	0	0	0	0	0	0	0	0	9.09091	0
	Natales	0	0	0	1	0	0	0	1	0	1	3	75	9.09091	9.09091
	Porvenir	0	0	0	0	0	0	0	0	0	0	0	0	9.09091	0
	Primavera	0	0	0	0	0	0	0	0	0	0	0	0	9.09091	0
	Punta Arenas	0	0	0	0	1	0	0	0	0	0	1	25	9.09091	9.09091
	Río Verde	0	0	0	0	0	0	0	0	0	0	0	0	9.09091	0
	San Gregorio	0	0	0	0	0	0	0	0	0	0	0	0	9.09091	0
	Timaukel	0	0	0	0	0	0	0	0	0	0	0	0	9.09091	0
	Torres del Paine	0	0	0	0	0	0	0	0	0	0	0	0	9.09091	0
	1st and 2nd five-year period	50					50					4	25	Regional Coverage Total	18.1818
R. Metropolitana	Alhué	0	0	0	0	0	0	0	0	0	0	0	0	1.92308	0
	Buin	0	0	0	1	0	0	0	0	0	0	1	0.505051	1.92308	0
	Calera de Tango	0	0	0	0	0	0	0	0	0	0	0	0	1.92308	0
	Cerrillos	0	0	0	0	1	0	0	0	0	0	1	0.505051	1.92308	1.92308
	Cerro Navia	0	0	0	0	0	0	0	0	0	0	0	0	1.92308	0
	Colina	0	0	0	0	0	0	0	0	0	0	0	0	1.92308	1.92308
	Conchalí	0	0	0	0	0	0	0	0	0	0	0	0	1.92308	0
	Curacaví	0	0	0	0	0	0	0	0	0	0	0	0	1.92308	0
	El Bosque	0	0	0	0	0	0	0	0	0	0	0	0	1.92308	0
	El Monte	0	0	0	0	0	0	0	0	0	0	0	0	1.92308	0
	Estación Central	0	0	1	0	0	0	0	0	1	0	2	1.0101	1.92308	1.92308
	Huechuraba	0	1	1	0	0	0	0	0	0	0	2	1.0101	1.92308	1.92308
	Independencia	0	0	0	1	0	0	0	0	0	0	1	0.505051	1.92308	1.92308
	Isla de Maipo	0	0	0	0	0	0	0	0	0	0	0	0	1.92308	0
	La Cisterna	0	0	0	1	0	0	0	0	0	0	1	0.505051	1.92308	1.92308
	La Florida	0	0	2	1	0	0	1	1	0	0	5	2.52525	1.92308	1.92308
	La Granja	0	0	0	0	0	0	0	0	0	1	1	0.505051	1.92308	1.92308
	La Pintana	0	0	0	0	0	0	0	0	0	0	0	0	1.92308	0
	La Reina	0	0	0	0	0	0	1	0	0	0	1	0.505051	1.92308	1.92308
	Lampa	0	0	0	0	0	0	0	1	0	0	1	0.505051	1.92308	1.92308
	Las Condes	0	0	5	0	3	7	7	9	11	19	61	30.8081	1.92308	1.92308
	Lo Barnechea	0	0	0	1	1	0	0	0	0	0	2	1.0101	1.92308	1.92308
	Lo Espejo	0	0	0	0	0	0	0	0	0	0	0	0	1.92308	0
	Lo Prado	0	0	0	0	0	0	0	0	0	0	0	0	1.92308	0
	Macul	0	0	0	1	1	0	0	0	0	0	2	1.0101	1.92308	1.92308
	Maipú	0	1	1	1	0	0	2	1	0	0	6	3.0303	1.92308	1.92308
	María Pinto	0	0	0	0	0	0	0	0	0	0	0	0	1.92308	0
	Melipilla	0	0	0	0	0	0	0	0	0	1	1	0.505051	1.92308	1.92308
	Ñuñoa	0	0	0	0	0	0	0	0	0	0	0	0	1.92308	1.92308
	Padre Hurtado	0	0	0	0	0	0	0	0	0	0	0	0	1.92308	0
	Paine	0	0	0	0	0	0	0	0	0	0	0	0	1.92308	0
	Pedro Aguirre Cerda	0	0	0	0	0	0	0	0	0	0	0	0	1.92308	0
	Peñaflor	0	0	0	0	0	0	0	0	0	0	0	0	1.92308	0
	Peñalolén	0	0	0	2	1	0	0	0	1	2	6	3.0303	1.92308	1.92308
	Pirque	0	0	0	0	0	0	0	0	0	0	0	0	1.92308	0
	Providencia	0	1	1	1	1	2	0	0	0	0	6	3.0303	1.92308	1.92308
	Pudahuel	0	0	0	2	0	0	1	1	0	0	4	2.0202	1.92308	1.92308
	Puente Alto	0	0	0	1	0	0	0	0	0	1	2	1.0101	1.92308	1.92308
	Quilicura	0	0	0	0	1	0	1	0	0	0	2	1.0101	1.92308	1.92308
	Quinta Normal	0	0	0	0	0	0	1	0	0	0	1	0.505051	1.92308	1.92308
	Recoleta	0	0	0	0	1	0	0	1	0	0	2	1.0101	1.92308	1.92308
	Renca	0	0	0	0	0	0	0	1	0	0	1	0.505051	1.92308	1.92308
	San Bernardo	0	0	0	0	0	0	1	0	0	0	1	0.505051	1.92308	1.92308
	San Joaquín	0	0	0	0	1	0	0	0	0	0	1	0.505051	1.92308	1.92308
	San José de Maipo	0	0	0	0	0	0	0	0	0	0	0	0	1.92308	0
	San Miguel	0	1	1	1	2	1	0	0	0	0	6	3.0303	1.92308	1.92308
	San Pedro	0	0	0	0	0	0	0	0	0	0	0	0	1.92308	0
	San Ramón	0	0	0	0	0	0	0	0	0	0	0	0	1.92308	0
	Santiago	0	1	9	7	7	4	5	4	7	30	74	37.3737	1.92308	1.92308	120
	Talagante	0	0	0	0	0	0	0	0	0	0	0	0	1.92308	0
	Tiltil	0	0	0	0	0	0	0	0	0	0	0	0	1.92308	0
	Vitacura	0	0	0	2	0	1	0	0	0	1	4	2.0202	1.92308	1.92308
	1st and 2nd five-year period	34.8					65.2					198	37.4	Regional Coverage Total	55.7692
